# Supplementary material
Source: Springer Nature journal article supplement (https://www.springermedizin.de/resource/supplementary/12933_2010_274_MOESM5_ESM.pdf/9539992)

**A**Relative BMP-6 mRNA expression  
(corrected for  $\beta$ -actin)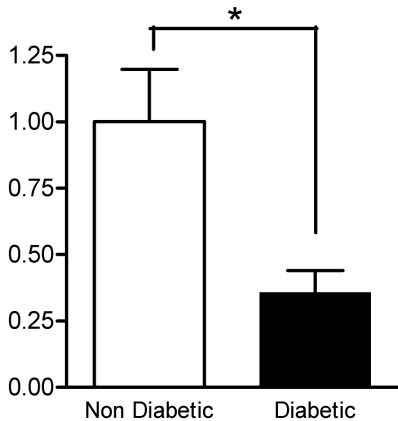**B**Relative TGF- $\beta$  mRNA expression  
(corrected for  $\beta$ -actin)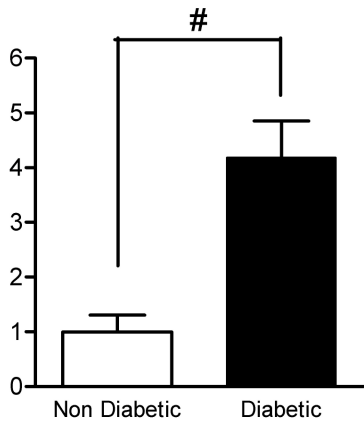

Supplement: MOESM5 [file 9539992]
